# Supplementary material for: Effect of the Consolidation Level on Organic Volatile Compound Emissions from Maize during Storage
Source: MDPI journal article supplement (doi:10.3390/ma16083066), 2023-04-13
Supplement: s1 [file s1]

## Supplementary Files

**Table S1.** The mean values of the obtained parameters using the Agrinose for different moisture content and consolidation for 9 days of the corn grain storage.

| Consolidation | Moisture content | Days | 2602 | AMS-MLV-P2 | 2603 | 2612  | 2610 | 2611 | 2620 | 2600 |
|---------------|------------------|------|------|------------|------|-------|------|------|------|------|
| 0 kPa         | 14%              | 1    | 0.33 | 0.40       | 0.05 | 0.01  | 0.26 | 0.25 | 0.48 | 0.42 |
|               |                  | 2    | 0.30 | 0.37       | 0.05 | 0.01  | 0.23 | 0.23 | 0.43 | 0.38 |
|               |                  | 3    | 0.21 | 0.24       | 0.04 | 0.01  | 0.20 | 0.19 | 0.26 | 0.19 |
|               |                  | 4    | 0.15 | 0.16       | 0.04 | 0.01  | 0.17 | 0.16 | 0.16 | 0.10 |
|               |                  | 5    | 0.15 | 0.18       | 0.02 | 0.00  | 0.12 | 0.12 | 0.23 | 0.19 |
|               |                  | 6    | 0.08 | 0.10       | 0.01 | 0.00  | 0.07 | 0.07 | 0.13 | 0.11 |
|               |                  | 7    | 0.05 | 0.08       | 0.01 | -0.00 | 0.04 | 0.04 | 0.08 | 0.07 |
|               |                  | 8    | 0.11 | 0.14       | 0.01 | 0.00  | 0.09 | 0.10 | 0.17 | 0.14 |
|               |                  | 9    | 0.10 | 0.11       | 0.01 | 0.00  | 0.08 | 0.08 | 0.15 | 0.13 |
|               | 17%              | 1    | 0.65 | 0.60       | 0.13 | 0.08  | 0.44 | 0.42 | 0.82 | 0.72 |
|               |                  | 2    | 0.59 | 0.54       | 0.12 | 0.07  | 0.40 | 0.38 | 0.75 | 0.66 |
|               |                  | 3    | 0.42 | 0.35       | 0.11 | 0.07  | 0.34 | 0.33 | 0.45 | 0.33 |
|               |                  | 4    | 0.30 | 0.23       | 0.10 | 0.07  | 0.29 | 0.28 | 0.27 | 0.16 |

|               |            |          |      |      |      |      |      |      |      |      |
|---------------|------------|----------|------|------|------|------|------|------|------|------|
|               |            | <b>5</b> | 0.27 | 0.19 | 0.02 | 0.04 | 0.16 | 0.17 | 0.29 | 0.23 |
|               |            | <b>6</b> | 0.25 | 0.16 | 0.01 | 0.05 | 0.13 | 0.13 | 0.24 | 0.20 |
|               |            | <b>7</b> | 0.20 | 0.15 | 0.01 | 0.03 | 0.11 | 0.11 | 0.21 | 0.17 |
|               |            | <b>8</b> | 0.22 | 0.19 | 0.02 | 0.04 | 0.15 | 0.17 | 0.28 | 0.23 |
|               |            | <b>9</b> | 0.21 | 0.15 | 0.02 | 0.04 | 0.14 | 0.14 | 0.25 | 0.21 |
| <b>40 kPa</b> | <b>14%</b> | <b>1</b> | 0.34 | 0.41 | 0.06 | 0.03 | 0.28 | 0.28 | 0.52 | 0.46 |
|               |            | <b>2</b> | 0.31 | 0.37 | 0.06 | 0.02 | 0.26 | 0.25 | 0.48 | 0.42 |
|               |            | <b>3</b> | 0.22 | 0.24 | 0.05 | 0.02 | 0.22 | 0.22 | 0.29 | 0.21 |
|               |            | <b>4</b> | 0.16 | 0.16 | 0.05 | 0.02 | 0.19 | 0.18 | 0.17 | 0.10 |
|               |            | <b>5</b> | 0.14 | 0.17 | 0.02 | 0.01 | 0.12 | 0.12 | 0.22 | 0.18 |
|               |            | <b>6</b> | 0.09 | 0.10 | 0.01 | 0.00 | 0.07 | 0.06 | 0.13 | 0.11 |
|               |            | <b>7</b> | 0.05 | 0.08 | 0.01 | 0.00 | 0.04 | 0.04 | 0.08 | 0.06 |
|               |            | <b>8</b> | 0.11 | 0.14 | 0.01 | 0.00 | 0.09 | 0.10 | 0.18 | 0.15 |
|               |            | <b>9</b> | 0.10 | 0.10 | 0.01 | 0.01 | 0.08 | 0.08 | 0.15 | 0.13 |
|               | <b>17%</b> | <b>1</b> | 0.55 | 0.53 | 0.11 | 0.06 | 0.36 | 0.34 | 0.68 | 0.60 |
|               |            | <b>2</b> | 0.50 | 0.48 | 0.10 | 0.06 | 0.32 | 0.31 | 0.62 | 0.54 |
|               |            | <b>3</b> | 0.36 | 0.31 | 0.10 | 0.05 | 0.28 | 0.26 | 0.37 | 0.27 |

|               |            |          |      |      |      |      |      |      |      |      |
|---------------|------------|----------|------|------|------|------|------|------|------|------|
|               |            | <b>4</b> | 0.26 | 0.20 | 0.09 | 0.05 | 0.23 | 0.22 | 0.22 | 0.14 |
|               |            | <b>5</b> | 0.14 | 0.14 | 0.02 | 0.01 | 0.11 | 0.12 | 0.19 | 0.16 |
|               |            | <b>6</b> | 0.09 | 0.10 | 0.01 | 0.03 | 0.08 | 0.08 | 0.14 | 0.11 |
|               |            | <b>7</b> | 0.06 | 0.09 | 0.01 | 0.01 | 0.06 | 0.07 | 0.11 | 0.09 |
|               |            | <b>8</b> | 0.10 | 0.14 | 0.02 | 0.03 | 0.10 | 0.12 | 0.18 | 0.15 |
|               |            | <b>9</b> | 0.08 | 0.10 | 0.01 | 0.02 | 0.09 | 0.10 | 0.15 | 0.12 |
| <b>80 kPa</b> | <b>14%</b> | <b>1</b> | 0.53 | 0.51 | 0.09 | 0.05 | 0.36 | 0.34 | 0.68 | 0.60 |
|               |            | <b>2</b> | 0.48 | 0.46 | 0.08 | 0.04 | 0.33 | 0.31 | 0.62 | 0.55 |
|               |            | <b>3</b> | 0.34 | 0.30 | 0.08 | 0.04 | 0.28 | 0.27 | 0.37 | 0.27 |
|               |            | <b>4</b> | 0.25 | 0.19 | 0.08 | 0.04 | 0.24 | 0.23 | 0.22 | 0.14 |
|               |            | <b>5</b> | 0.21 | 0.22 | 0.02 | 0.01 | 0.16 | 0.16 | 0.31 | 0.26 |
|               |            | <b>6</b> | 0.10 | 0.11 | 0.01 | 0.01 | 0.08 | 0.08 | 0.16 | 0.13 |
|               |            | <b>7</b> | 0.10 | 0.12 | 0.01 | 0.00 | 0.08 | 0.08 | 0.16 | 0.14 |
|               |            | <b>8</b> | 0.09 | 0.13 | 0.01 | 0.00 | 0.10 | 0.10 | 0.17 | 0.14 |
|               |            | <b>9</b> | 0.09 | 0.09 | 0.01 | 0.01 | 0.09 | 0.09 | 0.16 | 0.14 |
|               | <b>17%</b> | <b>1</b> | 0.48 | 0.49 | 0.09 | 0.00 | 0.31 | 0.30 | 0.59 | 0.52 |
|               |            | <b>2</b> | 0.43 | 0.45 | 0.09 | 0.00 | 0.29 | 0.27 | 0.54 | 0.47 |

|  |  |          |      |      |      |      |      |      |      |      |
|--|--|----------|------|------|------|------|------|------|------|------|
|  |  | <b>3</b> | 0.31 | 0.29 | 0.08 | 0.00 | 0.24 | 0.23 | 0.32 | 0.24 |
|  |  | <b>4</b> | 0.22 | 0.19 | 0.08 | 0.00 | 0.21 | 0.20 | 0.19 | 0.12 |
|  |  | <b>5</b> | 0.10 | 0.12 | 0.01 | 0.01 | 0.10 | 0.11 | 0.17 | 0.13 |
|  |  | <b>6</b> | 0.06 | 0.09 | 0.01 | 0.01 | 0.06 | 0.07 | 0.11 | 0.09 |
|  |  | <b>7</b> | 0.04 | 0.08 | 0.01 | 0.00 | 0.05 | 0.06 | 0.09 | 0.07 |
|  |  | <b>8</b> | 0.06 | 0.11 | 0.01 | 0.01 | 0.08 | 0.10 | 0.13 | 0.11 |
|  |  | <b>9</b> | 0.04 | 0.08 | 0.01 | 0.00 | 0.07 | 0.08 | 0.11 | 0.09 |

**Table S2.** Percentage share of groups of volatile organic compounds for different moisture content and consolidation for 9 days of the corn grain storage.

| Consolidation | Moisture content | Days | Alcohols | Acids | Ketones | Esters | Hydrocarbons | Azines | Terpenes | Aldehydes | Others |
|---------------|------------------|------|----------|-------|---------|--------|--------------|--------|----------|-----------|--------|
| 0 kPa         | 14%              | 1    | 12.50    | 1.44  | 4.33    | 75.96  | 1.44         | 1.92   | n.d.     | n.d.      | 2.40   |
|               |                  | 2    | 11.90    | 1.64  | 4.42    | 76.16  | 1.54         | 1.91   | n.d.     | n.d.      | 2.42   |
|               |                  | 3    | 12.10    | 1.74  | 4.22    | 76.06  | 1.24         | 1.90   | n.d.     | n.d.      | 2.73   |
|               |                  | 4    | 13.43    | 1.93  | 4.68    | 84.43  | 1.38         | 2.11   | n.d.     | n.d.      | 3.03   |
|               |                  | 5    | 14.42    | 2.33  | 4.19    | 73.95  | 1.86         | 1.86   | n.d.     | n.d.      | 1.40   |
|               |                  | 6    | 13.77    | 5.26  | 3.64    | 70.04  | 2.02         | 2.02   | n.d.     | n.d.      | 3.24   |

|        |     |   |       |       |       |       |       |      |      |      |      |
|--------|-----|---|-------|-------|-------|-------|-------|------|------|------|------|
|        |     | 7 | 14.56 | 1.94  | 2.43  | 76.21 | 1.46  | 1.94 | n.d. | n.d. | 1.46 |
|        |     | 8 | 14.78 | 1.97  | 1.97  | 75.86 | 1.48  | 2.46 | n.d. | n.d. | 1.48 |
|        |     | 9 | 15.17 | 1.90  | 4.27  | 74.41 | 1.42  | 1.42 | n.d. | n.d. | 1.42 |
|        | 17% | 1 | n.d.  | 22.91 | 37.44 | 18.06 | 18.50 | 3.08 | n.d. | n.d. | n.d. |
|        |     | 2 | 0.39  | 21.07 | 38.35 | 18.40 | 18.74 | 3.04 | n.d. | n.d. | n.d. |
|        |     | 3 | 0.61  | 20.49 | 37.95 | 18.11 | 19.32 | 3.03 | n.d. | n.d. | 0.50 |
|        |     | 4 | 0.68  | 22.74 | 42.12 | 20.10 | 21.44 | 3.36 | n.d. | n.d. | 0.56 |
|        |     | 5 | 5.66  | 15.09 | 43.94 | 15.09 | 7.01  | 2.70 | n.d. | 3.50 | 7.01 |
|        |     | 6 | 13.22 | 10.34 | 31.90 | 16.95 | 12.64 | n.d. | 4.60 | 6.61 | 3.74 |
|        |     | 7 | 11.21 | 8.01  | 44.62 | 12.81 | 9.61  | 2.52 | 3.66 | 2.52 | 5.03 |
|        |     | 8 | 11.82 | 13.64 | 38.86 | 15.00 | 7.73  | 2.73 | 4.09 | 2.95 | 3.18 |
|        |     | 9 | 12.56 | 11.88 | 39.91 | 13.45 | 8.74  | 2.47 | 3.36 | 2.69 | 4.93 |
| 40 kPa | 14% | 1 | 20.65 | 11.59 | 28.97 | 11.84 | 19.40 | n.d. | 4.28 | n.d. | 3.27 |
|        |     | 2 | 19.85 | 12.79 | 27.97 | 11.54 | 20.95 | n.d. | 3.33 | n.d. | 3.57 |
|        |     | 3 | 20.25 | 12.87 | 27.97 | 11.46 | 20.66 | n.d. | 3.21 | n.d. | 3.57 |
|        |     | 4 | 22.48 | 14.28 | 31.04 | 12.72 | 22.93 | n.d. | 3.56 | n.d. | 3.97 |
|        |     | 5 | 10.82 | 15.08 | 32.79 | 10.82 | 25.25 | n.d. | n.d. | n.d. | 5.25 |

|        |     |   |       |       |       |       |       |      |      |       |      |
|--------|-----|---|-------|-------|-------|-------|-------|------|------|-------|------|
|        |     | 6 | 19.08 | 8.92  | 35.38 | 12.31 | 14.77 | n.d. | 5.23 | n.d.  | 4.31 |
|        |     | 7 | 21.44 | 10.33 | 27.29 | 13.84 | 19.49 | n.d. | 4.68 | n.d.  | 2.92 |
|        |     | 8 | 17.39 | 9.21  | 32.74 | 13.30 | 18.16 | n.d. | 5.63 | n.d.  | 3.58 |
|        |     | 9 | 15.07 | 7.86  | 29.48 | 6.33  | 28.38 | n.d. | 4.37 | 5.02  | 3.49 |
|        | 17% | 1 | 41.70 | 6.56  | 18.53 | 10.42 | 2.32  | n.d. | 3.09 | 11.20 | 6.18 |
|        |     | 2 | 40.70 | 7.56  | 19.53 | 11.42 | 2.42  | n.d. | 3.09 | 9.20  | 6.08 |
|        |     | 3 | 41.88 | 7.37  | 18.53 | 12.25 | 2.12  | n.d. | 3.08 | 8.76  | 6.01 |
|        |     | 4 | 46.49 | 8.18  | 20.57 | 13.59 | 2.35  | n.d. | 3.42 | 9.72  | 6.67 |
|        |     | 5 | 10.64 | 9.84  | 48.40 | 19.95 | 2.66  | n.d. | 3.19 | 2.39  | 2.93 |
|        |     | 6 | 15.17 | 10.20 | 24.88 | 21.39 | 14.43 | n.d. | 4.73 | 2.74  | 6.47 |
|        |     | 7 | 11.84 | 12.34 | 25.19 | 20.65 | 14.11 | n.d. | 5.04 | 7.81  | 3.02 |
|        |     | 8 | 13.23 | 10.90 | 23.20 | 15.31 | 20.65 | n.d. | 6.50 | 7.42  | 2.78 |
|        |     | 9 | 11.24 | 9.88  | 26.94 | 22.09 | 11.43 | n.d. | 3.88 | 6.98  | 7.56 |
| 80 kPa | 14% | 1 | n.d.  | 6.22  | 64.73 | 21.58 | 2.07  | 2.49 | n.d. | n.d.  | 2.90 |
|        |     | 2 | 1.01  | 5.24  | 65.63 | 20.57 | 2.07  | 2.53 | n.d. | n.d.  | 2.95 |
|        |     | 3 | 2.11  | 5.04  | 65.33 | 20.46 | 2.09  | 2.33 | n.d. | n.d.  | 2.63 |
|        |     | 4 | 2.34  | 5.60  | 72.52 | 22.71 | 2.33  | 2.58 | n.d. | n.d.  | 2.92 |

|  |     |   |       |       |       |       |       |      |      |      |      |
|--|-----|---|-------|-------|-------|-------|-------|------|------|------|------|
|  |     | 5 | 4.04  | 3.68  | 70.96 | 15.07 | 2.57  | n.d. | n.d. | n.d. | 3.68 |
|  |     | 6 | 10.85 | 8.94  | 35.53 | 28.30 | 7.45  | n.d. | 5.11 | n.d. | 3.83 |
|  |     | 7 | 5.67  | 13.15 | 34.69 | 26.08 | 7.94  | 3.17 | 5.22 | n.d. | 4.08 |
|  |     | 8 | 5.53  | 11.46 | 29.84 | 28.85 | 16.01 | n.d. | 4.94 | n.d. | 3.36 |
|  |     | 9 | 6.10  | 12.91 | 42.02 | 21.13 | 4.69  | 3.52 | 5.40 | n.d. | 4.23 |
|  | 17% | 1 | 37.50 | 5.56  | 27.08 | 9.03  | 5.90  | 1.74 | 2.78 | 6.25 | 4.17 |
|  |     | 2 | 35.50 | 5.76  | 29.08 | 9.53  | 5.30  | 1.76 | 2.63 | 6.03 | 4.41 |
|  |     | 3 | 33.20 | 5.78  | 32.28 | 9.78  | 4.88  | 7.96 | 2.28 | 5.71 | 4.13 |
|  |     | 4 | 36.85 | 6.42  | 35.83 | 10.85 | 5.41  | 2.18 | 2.53 | 6.34 | 4.58 |
|  |     | 5 | 6.90  | 6.03  | 66.81 | 13.79 | 2.16  | 2.16 | n.d. | n.d. | 2.16 |
|  |     | 6 | 13.83 | 9.47  | 32.52 | 20.63 | 14.32 | n.d. | 5.34 | n.d. | 3.88 |
|  |     | 7 | 10.09 | 8.77  | 36.18 | 19.08 | 10.53 | 2.85 | 4.61 | 4.61 | 3.29 |
|  |     | 8 | 12.63 | 8.00  | 36.84 | 22.74 | 9.05  | n.d. | 4.00 | 3.79 | 2.95 |
|  |     | 9 | 10.94 | 9.11  | 40.10 | 20.57 | 7.55  | 3.13 | 4.95 | n.d. | 3.65 |

n.d. – not detected

**Table S3.** Technical data of Agrinose sensors

| Type          | Description                                                                                         | Detecting range (ppm)   |
|---------------|-----------------------------------------------------------------------------------------------------|-------------------------|
| TGS2600 - B00 | General air contaminants, hydrogen and carbon monoxide                                              | 1 - 3 (H <sub>2</sub> ) |
| TGS2610 - C00 | LP gas, butane                                                                                      | 500 - 10 000            |
| TGS2602 - B00 | Ammonia, Hydrogen sulfide (high sensitivity to VOC and odorous gases)                               | 1 - 30 (EtOH)           |
| TGS2611 - C00 | Natural gas, methane                                                                                | 500 - 10 000            |
| TGS2603 - B01 | Odors generated from spoiled foods                                                                  | 1 - 10 (EtOH)           |
| TGS8100 MEMS  | Cooking odors, gaseous air contaminants                                                             | 1 – 30 H <sub>2</sub>   |
| TGS2620 - C00 | Solvent vapours, volatile vapors, alcohol                                                           | 50 - 5 000              |
| AS – MLV - P2 | CO, butane, methane, ethanol, hydrogen. Specifically designed for volatile organic compounds (VOCs) | 10 - 10 000             |
